# Supplementary material for: Coral bacterial community structure responds to environmental change in a host-specific manner
Source: PubMed Central journal article supplement (PMC6626051; doi:10.1038/s41467-019-10969-5), 2019-07-12
Supplement: 41467_2019_10969_MOESM3_ESM.pdf [file 41467_2019_10969_MOESM3_ESM.pdf]

## **Description of Additional Supplementary Files**

File Name: Supplementary Data 1

Description: Number of sequences available per sample before and after quality control.

File Name: Supplementary Data 2

Description: Representative sequences for bacterial OTUs at 97 % similarity cutoff.

File Name: Supplementary Data 3

Description: Statistical results (PERMANOVA) of re-analyses of data sets at 99 % similarity cutoff for OTUs, at 97 % similarity cutoff excluding Endozoicomonadaceae family, and between impacts (pooled sites) for all data sets.

File Name: Supplementary Data 4

Description: Count table of bacterial OTUs at 99 % similarity cutoff after subsampling to 3,101 sequences per sample.

File Name: Supplementary Data 5

Description: Count table of bacterial OTUs at 97 % similarity cutoff without Endozoicomonadaceae family after subsampling to 3,101 sequences per sample.

File Name: Supplementary Data 6

Description: Indicator species analysis of bacterial taxa associated with the corals *Acropora hemprichii* and *Pocillopora verrucosa* between sites close to Jeddah, Red Sea.
